# Supplementary material
Source: HighWire-hosted journal article supplement (https://www.cancerbiomed.org/content/18/3/788)
Supplement: media-1 [file media-1.pdf]

# Supplementary materials

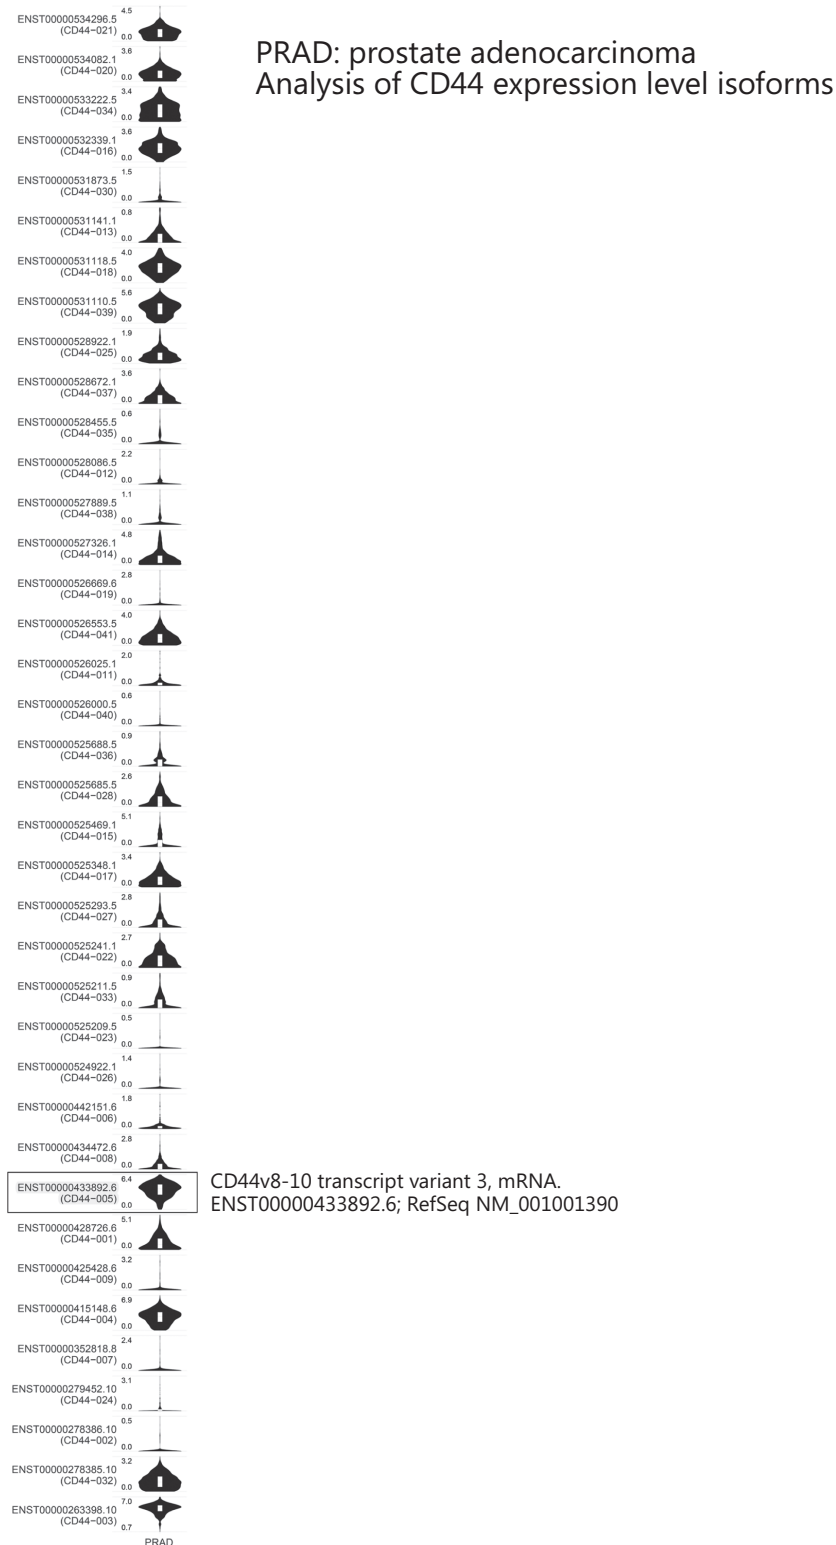

**Figure S1** Inhibition of CD44v8-10 expression by specific siRNA treatment.

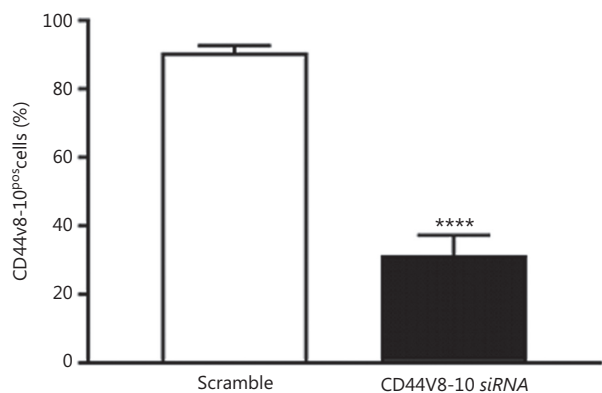

**Figure S2** Violin plots showing the expression of CD44 isoforms in PRAD TGCA datasets ( $n = 492$ ). The box-plots (white) represent the mRNA expression. The violin plot outlines (black) illustrate kernel probability density. The CD44v8-10 isoform is indicated in the figure. Scale of the graphs:  $\log_{10}$ .

**Table S1** List of primers used for gene expression analysis

| Target gene                     | Forward primer                       | Reverse primer                       |
|---------------------------------|--------------------------------------|--------------------------------------|
| <i>PPAR<math>\gamma</math></i>  | 5'-TCAAACGAGAGTCAGCCTTTAACG-3'       | 5'-AGTGGGAGTGGTCTCCATTACG-3'         |
| <i>RUNX2</i>                    | 5'-CCCGTGGCCTTCAAGGT-3'              | 5'-CGTTACCCGCCATGACAGTA-3'           |
| <i>RUNX2</i>                    | 5'-TTACTTACACCCCGCCAGTC-3'           | 5'-TATGGAGTGCTGCTGGTCTG-3'           |
| <i><math>\beta</math>-actin</i> | 5'-GAGGCCAGAGCAAGAGAG-3'             | 5'-AGGTGTGGTGCCAGATTTTC-3'           |
| <i>H3</i>                       | 5'-GTGAAGAAACCTCATCGTTACAGGCCTGGT-3' | 5'-CTGCAAAGCACCAATAGCTGCACTCTGGAA-3' |
| <i>ANKRD1</i>                   | 5'-CTGTGAGGCTGAACCGCTAT-3'           | 5'-CTGTGAGGCTGAACCGCTAT-3'           |
| <i>Cyr61</i>                    | 5'-AGCCTCGCATCTATAACAAC-3'           | 5'-TTCTTTCACAA GCGGCACTC-3'          |
| <i>TAZ (WWTR1)</i>              | 5'-CCATCACTAATAATAGCTCAGATCG-3'      | 5'-GTGATTACAGCCAGG TTAGAAAG-3'       |
| <i>Col1A1</i>                   | 5'-GATTCCTGGACCTAAAGGTGC-3'          | 5'-AGCCTCTCCATCTTTGCCAGCA-3'         |
| <i>Col1A2</i>                   | 5'-CCTGGTGCTAAAGGAGAAAGAGG-3'        | 5'-ATCACCAGCACTTCCAGCAGGA-3'         |
| <i>MPP9</i>                     | 5'-GCCACTACTGTGCCTTTGAGTC-3'         | 5'-CCCTCAGAGAATCGCCAGTACT-3'         |
| <i>MPP13</i>                    | 5'-AAGGAGCATGGCGACTTCT-3'            | 5'-TGGCCAGGAGGAAAAGC-3'              |
| <i>IL-6</i>                     | 5'-ATGAACTCTTCTCCACAAGC-3'           | 5'-GTTTTCTGCCAGTGCCTCTTTG-3'         |
